# Supplementary material for: The sustainable cycle of a new cacao-based bioplastic: from manufacturing to exploitable biodegradation products
Source: Royal Society of Chemistry journal article supplement (doi:10.1039/d1ra04432j), 2021-01-01
Supplement: d1ra04432j1.pdf [file d1ra04432j1.pdf]

## **The sustainable cycle of bio-based plastic: from manufacturing to biodegradation procedure**

Allan Calmont de Andrade Almeida<sup>1</sup>, João Guilherme de Moraes Pontes<sup>1</sup>, Gabriel Rodrigues Alvarenga<sup>1</sup>, Henrique Finocchio<sup>2\*</sup>, Taicia Pacheco Fill<sup>1,\*</sup>

<sup>1</sup>Universidade Estadual de Campinas (UNICAMP), Organic Chemistry, Laboratório de Biologia Química Microbiana (LABIOQUIMI), Campinas-SP, P. O. Box 6154, 13083-970, Brazil.

<sup>2</sup>Afinko Soluções em Polímeros, São Carlos-SP, 13570-591, Brazil.

# Corresponding author: [taicia@unicamp.br](mailto:taicia@unicamp.br), [henrique@afinkopolimeros.com.br](mailto:henrique@afinkopolimeros.com.br)

## Contents

### 1. Manufacture of bio-based plastic and properties

|                                                     |    |
|-----------------------------------------------------|----|
| Granulometric characteristics (Table S1)            | S3 |
| Torque values (Table S2)                            | S4 |
| Melt Flow Index (MFI) (Table S3)                    | S4 |
| Comparison between mechanical properties (Table S4) | S5 |

### 2. Fungi used in biodegradation study

|                                                                |    |
|----------------------------------------------------------------|----|
| Phylogenetic analysis of <i>Colletotrichum gloeosporioides</i> | S6 |
| Cultures in different stages (after 45 and 75 days)            | S7 |

### 3. LC-MS/MS of metabolites produced by fungi

|                                      |     |
|--------------------------------------|-----|
| LC-MS/MS data of 2-hydroxyacorenone  | S8  |
| LC-MS/MS data of zearalenone         | S10 |
| LC-MS/MS data of zearalenone sulfate | S12 |
| LC-MS/MS data of aurofusarin         | S14 |

### 4. LC-MS/MS of the biodegradation process

|                                    |     |
|------------------------------------|-----|
| LC-MS/MS data of theobromine       | S16 |
| LC-MS/MS data of caffeine          | S17 |
| Relative quantification (Table S5) | S18 |

## 1. Manufacture of bio-based plastic and properties

**Table S1.** Granulometric characteristics of the cocoa bean shell powder

| Smaller than 0.5 mm                                                                 | 0.5 to 1.0 mm                                                                     | 1.0 to 2.0 mm                                                                      | Bigger than 2.0 mm                                                                  |
|-------------------------------------------------------------------------------------|-----------------------------------------------------------------------------------|------------------------------------------------------------------------------------|-------------------------------------------------------------------------------------|
| 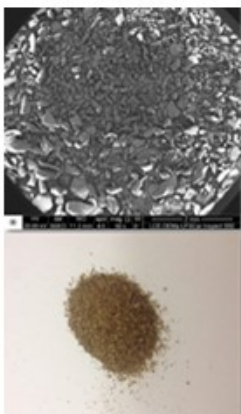   | 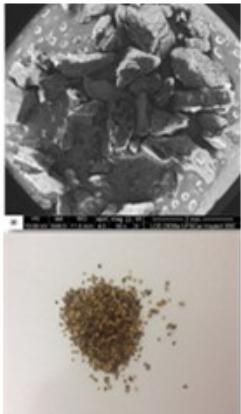 | 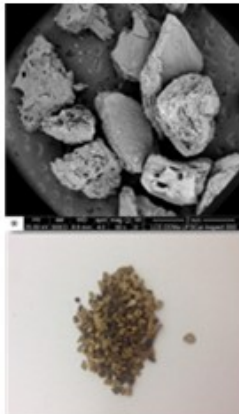 | 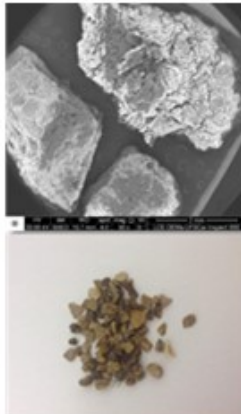 |
| <b>Mass percentage of each granulometric essay of the total powder obtained (%)</b> |                                                                                   |                                                                                    |                                                                                     |
| 13.5                                                                                | 24.1                                                                              | 46.3                                                                               | 16.2                                                                                |
| <b>Bulk Density (g/cm<sup>3</sup>)</b>                                              |                                                                                   |                                                                                    |                                                                                     |
| 0.42                                                                                | 0.44                                                                              | 0.45                                                                               | Not acquired                                                                        |
| <b>Real Density (g/cm<sup>3</sup>)</b>                                              |                                                                                   |                                                                                    |                                                                                     |
| 1.442                                                                               | 1.445                                                                             | 1.515                                                                              | Not acquired                                                                        |
| <b>Stacking Factor</b>                                                              |                                                                                   |                                                                                    |                                                                                     |
| 0.57                                                                                | 0.50                                                                              | 0.46                                                                               | Not acquired                                                                        |

**Table S2.** Torque values for the thermoplastics and the mixtures at the end of the essay of bio-based plastics manufactured with polypropylene (PP) and polyethylene (PE) in different compositions

| <b>Composition (PP)</b>   | <b>Torque (N.m)</b> | <b>Composition (PE)</b> | <b>Torque (N.m)</b> |
|---------------------------|---------------------|-------------------------|---------------------|
| PP100                     | 3.3                 | PE100                   | 8.8                 |
| PP80/20 (1) <sup>a</sup>  | 3.7                 | PE80/20 (1)             | 10.0                |
| PP60/40 (1)               | 5.8                 | PE60/40 (1)             | 14.2                |
| PP60/40c <sup>b</sup> (1) | 5.8                 | PE60/40c (1)            | 16.0                |
| PP80/20 (2) <sup>c</sup>  | 3.9                 | PE80/20 (2)             | 9.8                 |
| PP60/40 (2)               | 6.1                 | PE60/40 (2)             | 14.6                |
| PP60/40c (2)              | 5.8                 | PE60/40c (2)            | 15.2                |

<sup>a</sup> The number (1) indicates a granulometry of cocoa shells up to 0.5 mm (see Table S1).

<sup>b</sup> The letter c indicates the addition of a compatibilizing agent.

<sup>c</sup> The number (2) indicates a granulometry of cocoa shells between 0.5 to 2.0 mm (see Table S1).

**Table S3.** Melt Flow Index (MFI) results for extruded samples of bio-based plastics manufactured with polypropylene (PP) and polyethylene (PE) in different compositions

| <b>PP-based samples</b>   | <b>MFI 230 °C / 2.16 kg (g/10 min)</b> |
|---------------------------|----------------------------------------|
| PP100                     | 27.7 ± 0.1                             |
| PP80/20                   | 19.5 ± 0.3                             |
| PP80/20c <sup>a</sup>     | 16.8 ± 0.2                             |
| <b>HDPE-based samples</b> | <b>MFI 190 °C / 2.16 kg (g/10 min)</b> |
| PE100                     | 7.2 ± 0.1                              |
| PE80/20                   | 5.4 ± 0.1                              |
| PE80/20c                  | 5.7 ± 0.3                              |

<sup>a</sup> The letter c indicates the addition of a compatibilizing agent.

**Table S4.** Comparison between mechanical properties of bio-based plastics manufactured with polypropylene (PP) and polyethylene (PE) in different compositions

| <b>Sample</b>         | <b>Young's modulus (GPa)</b> | <b>Tensile Strength (MPa)</b> | <b>Elongation (%)</b> |
|-----------------------|------------------------------|-------------------------------|-----------------------|
| PP100                 | $0.97 \pm 0.09$              | $17.9 \pm 0.4$                | $20.2 \pm 2.9$        |
| PP80/20               | $1.13 \pm 0.37$              | $15.5 \pm 0.1$                | $3.9 \pm 0.3$         |
| PP80/20c <sup>a</sup> | $1.25 \pm 0.17$              | $15.1 \pm 0.3$                | $3.4 \pm 0.6$         |
| PE100                 | $1.37 \pm 0.05$              | $25.5 \pm 0.4$                | $418.9 \pm 4.4$       |
| PE80/20               | $1.14 \pm 0.10$              | $22.5 \pm 0.3$                | $7.6 \pm 1.2$         |
| PE80/20c              | $1.9 \pm 0.21$               | $20.5 \pm 0.3$                | $8.1 \pm 1.1$         |

<sup>a</sup> The letter c indicates the addition of a compatibilizing agent.

## 2. Fungi used in biodegradation study

### *Colletotrichum gloeosporioides*

> consensus 1649/17 - DRM 03

```
ATTACTGAGTTTACGCTCTACAACCCTTTGTGAACATACCTACAACCTGTTGCTTCGGCGGGTAGGGTCCCCGTGACCCCTCCCGGCCCTCC
CGCCCCCGGGCGGGTTCGGCGCCCGCCGAGGATAACCAAACCTCTGATTTAACGACGTTTCTTCTGAGTGGTACAAGCAAATAATCAA
AACTTTTAACAACGGATCTCTTGGTTCTGGCATCGATGAAGAACCGAGCGAAATGCGATAAGTAATGTGAATTGCAGAATTCAGTGAAT
CATCGAATCTTTGAACGCACATTGCGCCCGCCAGCATTCTGGCGGGCATGCCTGTTTCGAGCGTCATTTCAACCCCTCAAGCTCTGCTTGG
TGTTGGGGCCCTACAGCTGATGTAGGCCCTCAAAGGTAGTGGCGGACCCCTCCCGGAGCCTCCTTTGCGTAGTAACCTTTACGCTCTCGCAC
TGGGATCCGAGGGACTCTTGCCGTAAACCCCAATTTTCCAAGGTTGACCTCGGATCAGGTAGGAATACCCGCTGAACCTTAAGC
```

**Figure S1.** Partial sequence of the ribosomal operon of C4 (*Colletotrichum gloeosporioides*). Analyses performed at CPQBA.

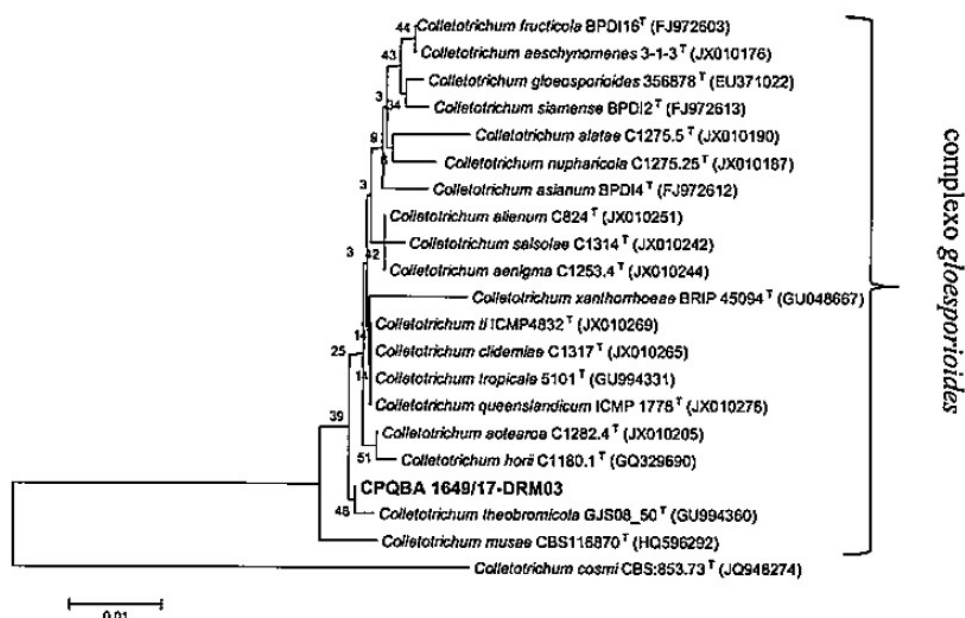

**Figure S2.** Phylogenetic tree demonstrating the relationships between the partial sequence of the ribosomal operon region ITS1-5.8S-ITS2 of C4 (*Colletotrichum gloeosporioides*) and sequences of strains of related microorganisms present in the databases CBS and Genbank. Analyses performed at Centro Pluridisciplinar de Pesquisas Químicas, Biológicas e Agrícolas (CPQBA).

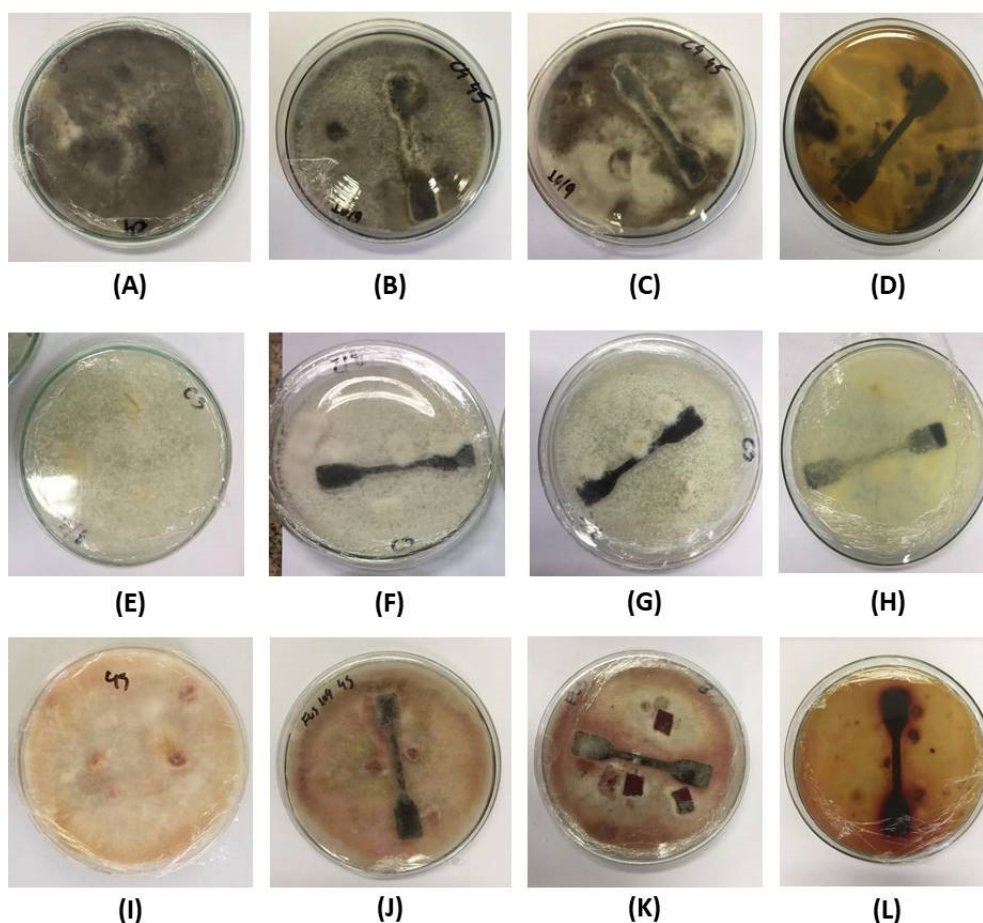

**Figure S3.** *C. gloeosporioides*, *Xylaria* sp. and *F. graminearum* cultures in different stages **a)** *C. gloeosporioides* (control) **b)** *C. gloeosporioides*-polymer interaction after 45 days **c)** *C. gloeosporioides*-polymer interaction after 75 days (frontal side) **d)** *C. gloeosporioides*-polymer interaction after 75 days (back side) **e)** *Xylaria* sp. (control) **f)** *Xylaria* sp.-polymer interaction after 45 days **g)** *Xylaria* sp.-polymer interaction after 75 days (frontal side) **h)** *Xylaria* sp.-polymer interaction after 75 days (back side) **i)** *F. graminearum* (control) **j)** *F. graminearum*-polymer interaction after 45 days **k)** *F. graminearum*-polymer interaction after 75 days (frontal side) **l)** *F. graminearum*-polymer interaction after 75 days (back side).

### 3. LC-MS/MS of metabolites produced by fungi

## 2-HYDROXYACORENONE

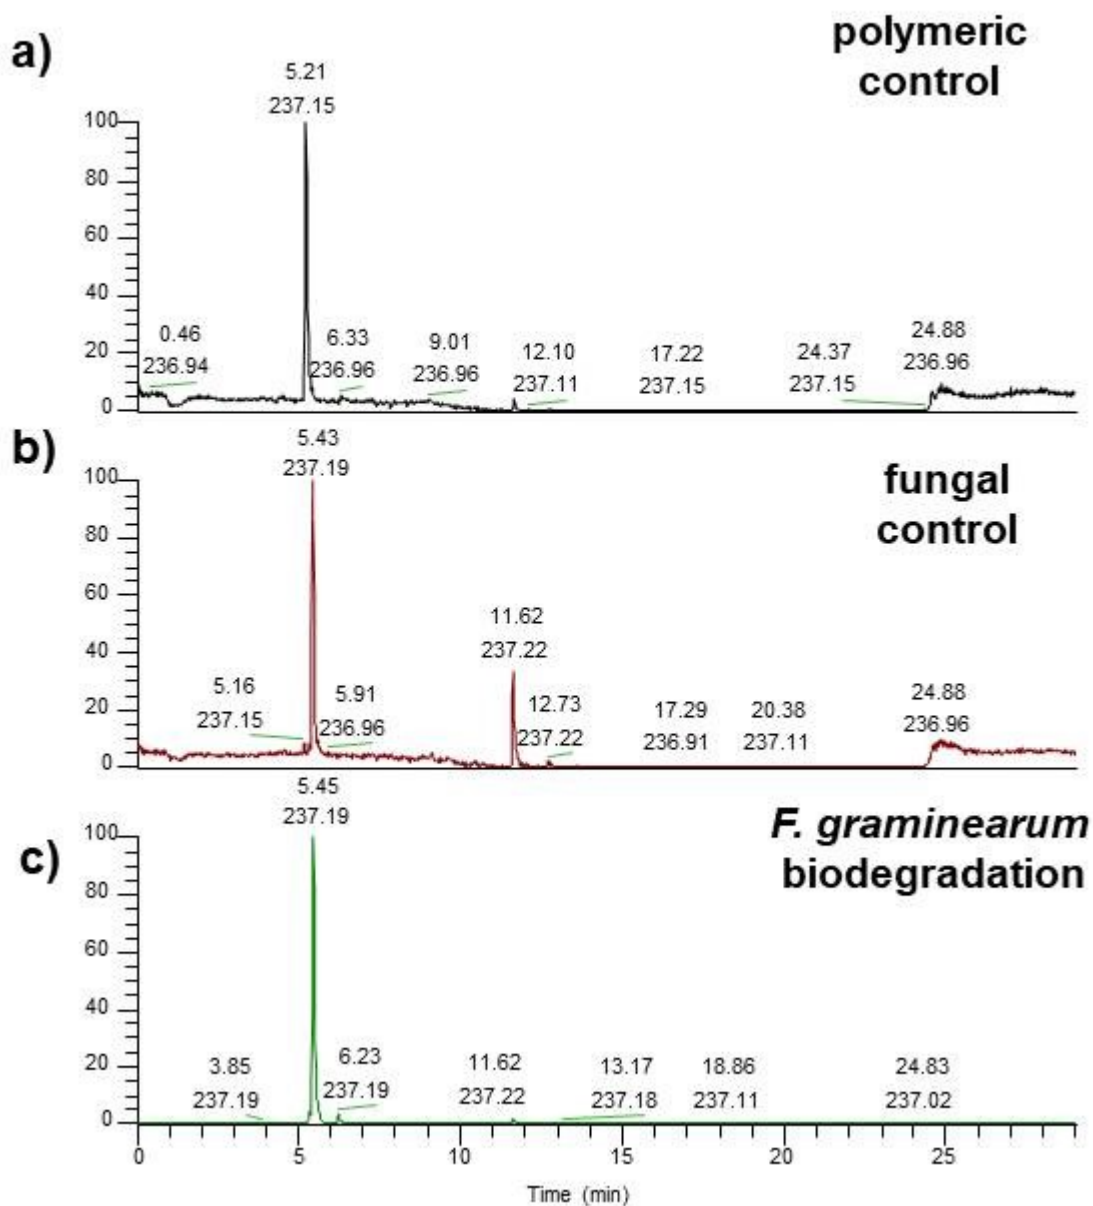

**Figure S4.** Ion chromatogram extracted ( $m/z$  237.1843) to **a)** polymeric control; **b)** fungal control; **c)** *F. graminearum* biodegradation. LC-MS/MS spectrum of 2-hydroxyacorenone was found at retention time 5.45 min.

## 2-HYDROXYACORENONE - $m/z$ 237.1852 $[M+H]^+$

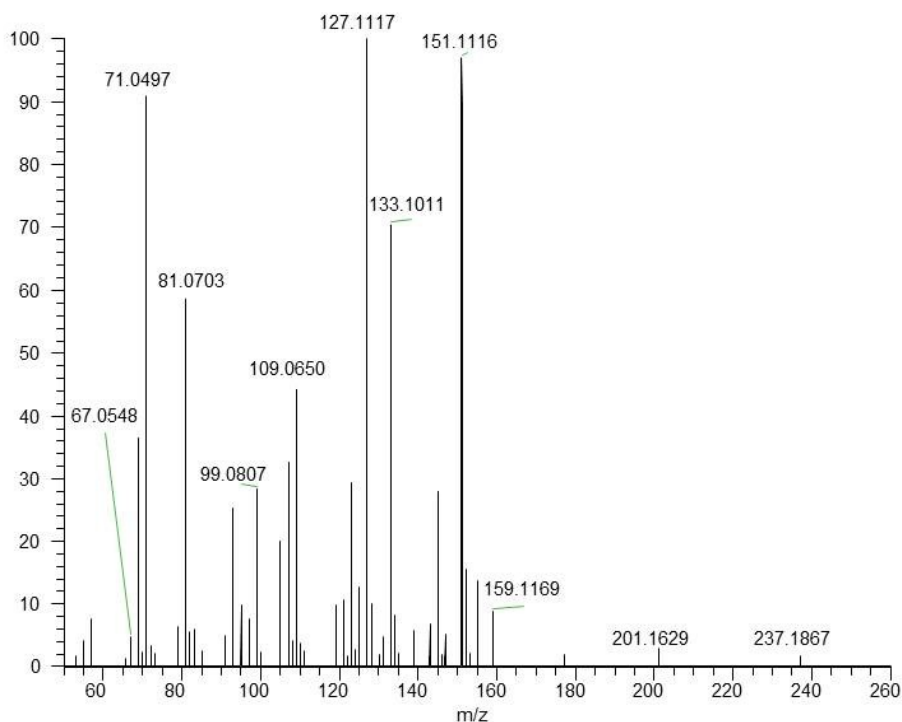

| Database $m/z$<br>(HMDB) predicted<br>spectrum | Experimental $m/z$ | Error (ppm) | Formula Xcalibur |
|------------------------------------------------|--------------------|-------------|------------------|
| 53.0391                                        | 53.0392            | 0.42        | $CH_5$           |
| 55.0548                                        | 55.0549            | 0.58        | $C_4H_7$         |
| 57.0704                                        | 57.0341            | 0.39        | $C_3H_5O$        |
| 67.0548                                        | 67.0548            | 0.53        | $C_5H_7$         |
| 79.0547                                        | 79.0547            | 0.29        | $C_6H_7$         |
| 81.0704                                        | 81.0703            | 0.44        | $C_6H_9$         |
| 109.1017                                       | 109.1013           | 0.13        | $C_8H_{13}$      |
| 121.1017                                       | 121.1012           | 0.01        | $C_9H_{13}$      |
| 123.1173                                       | 123.1169           | 0.13        | $C_9H_{15}$      |
| 135.1173                                       | 135.1164           | 0.53        | $C_{10}H_{15}$   |
| 151.1122                                       | 151.1116           | -0.09       | $C_{10}H_{15}O$  |

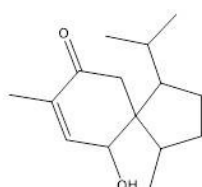

2-Hydroxyacorenone ( $C_{30}H_{18}O_{12}$ )

| $m/z$    | Theo. Mass | Delta (ppm) | RDB equiv. | Composition       |
|----------|------------|-------------|------------|-------------------|
| 237.1849 | 237.1849   | 0.14        | 3.5        | $C_{15}H_{25}O_2$ |

**Figure S5.** LC-MS/MS spectrum of 2-hydroxyacorenone and comparison of experimental  $m/z$  values with predicted spectrum from HMDB ([https://hmdb.ca/spectra/ms\\_ms/81872](https://hmdb.ca/spectra/ms_ms/81872)).

# ZEARALENONE

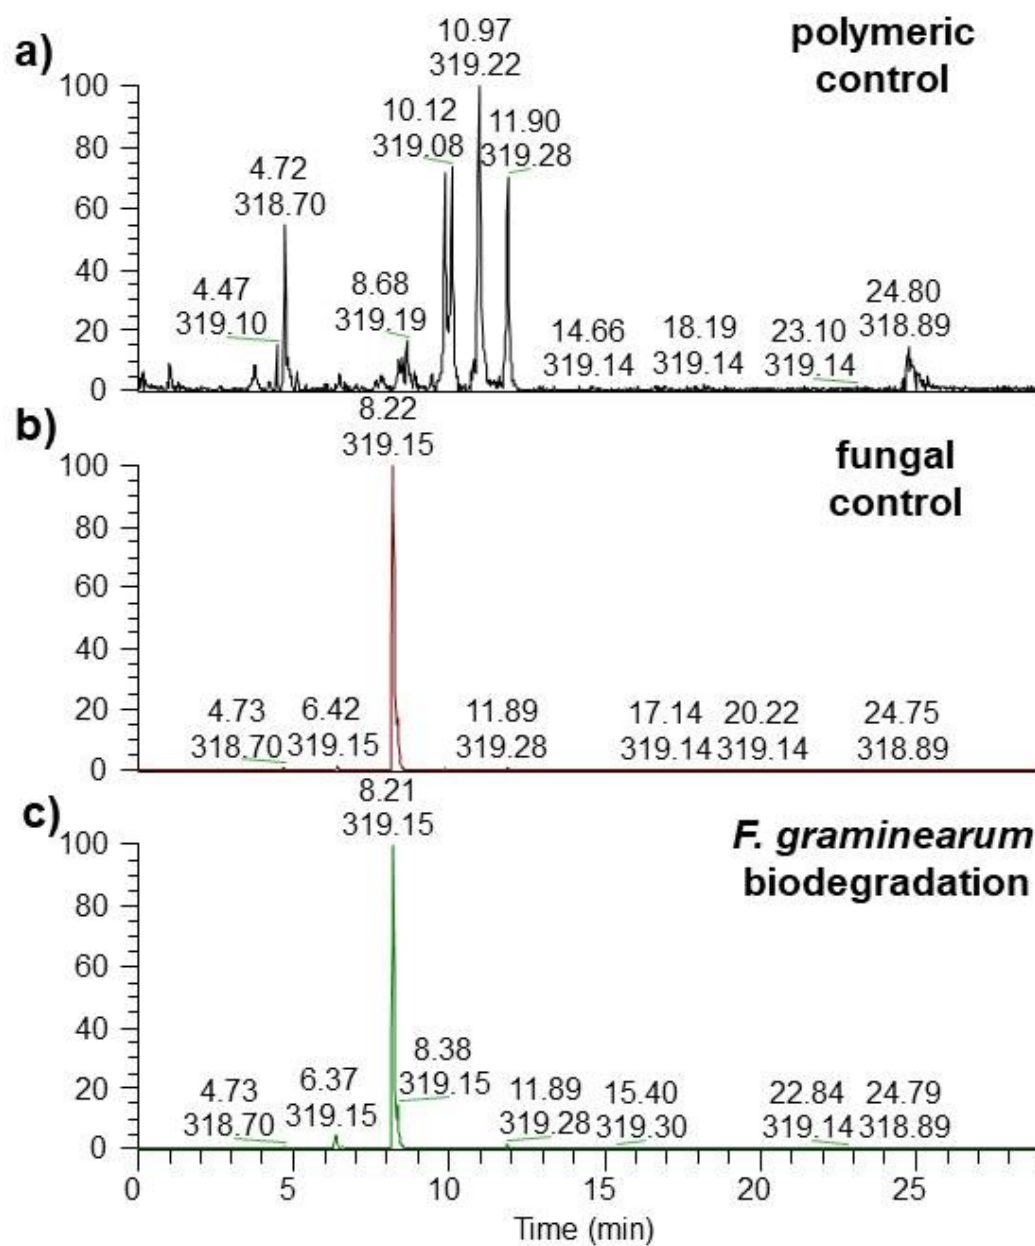

**Figure S6.** Ion chromatogram extracted ( $m/z$  319.1540) to **a)** polymeric control; **b)** fungal control; **c)** *F. graminearum* biodegradation. LC-MS/MS spectrum of zearalenone was found at retention time 8.21 min.

## ZEARALENONE - $m/z$ 319.1541 $[M+H]^+$

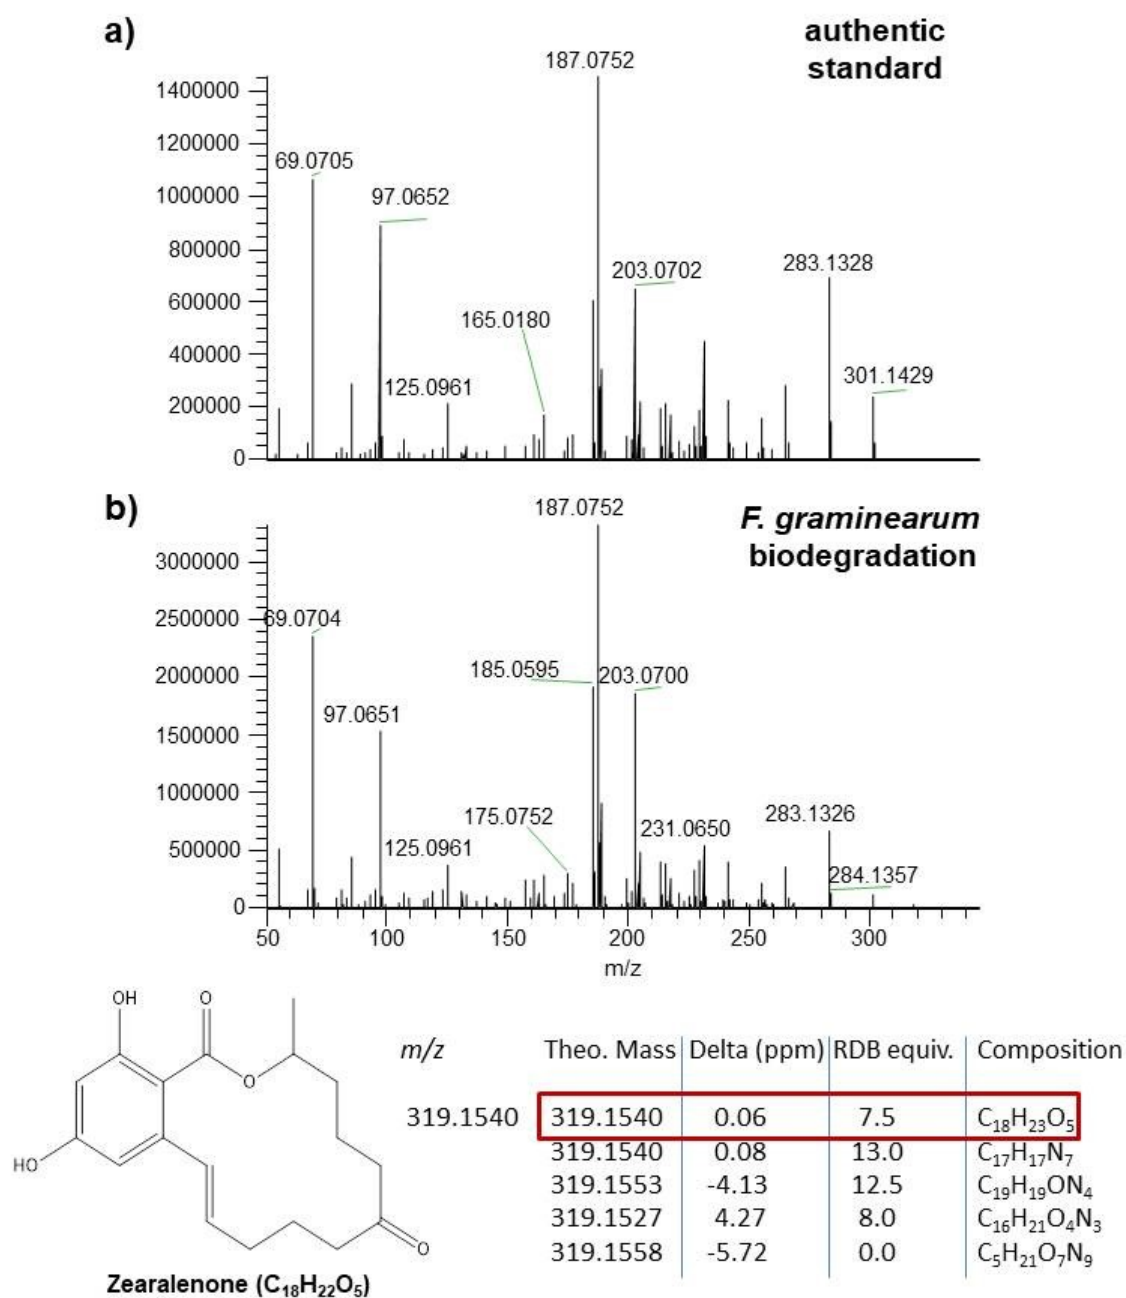

**Figure S7.** LC-MS/MS spectra in positive ionization mode to **a)** Authentic standard of zearalenone; **b)** *F. graminearum* biodegradation.

# ZEARALENONE SULFATE

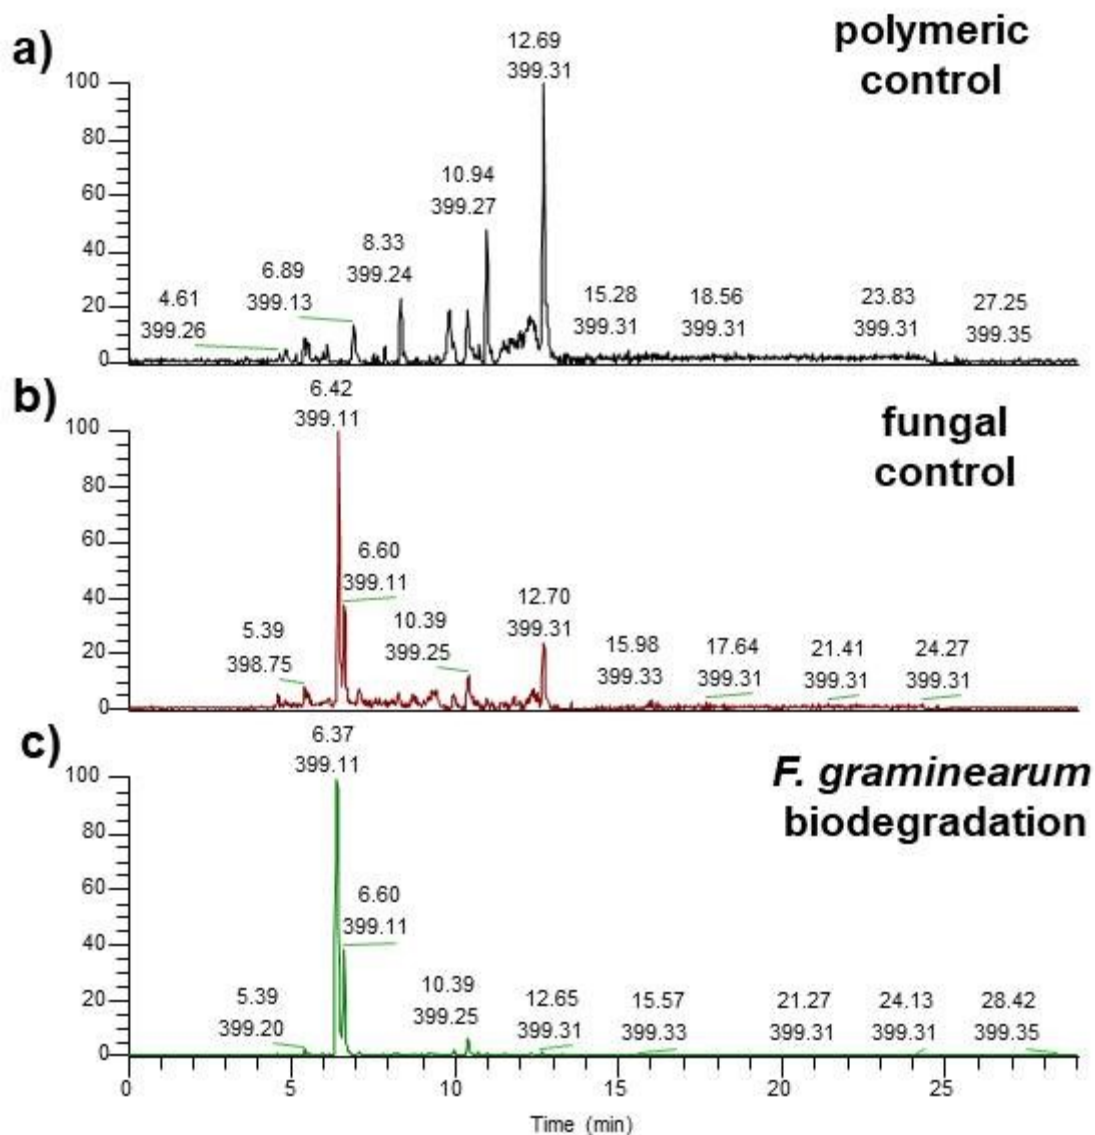

**Figure S8.** Ion chromatogram extracted ( $m/z$  399.1108) to **a)** polymeric control; **b)** fungal control; **c)** *F. graminearum* biodegradation. LC-MS/MS spectrum of zearalenone sulfate was found at retention time 6.37 min.

## ZEARALENONE SULFATE - $m/z$ 399.1108 $[M+H]^+$

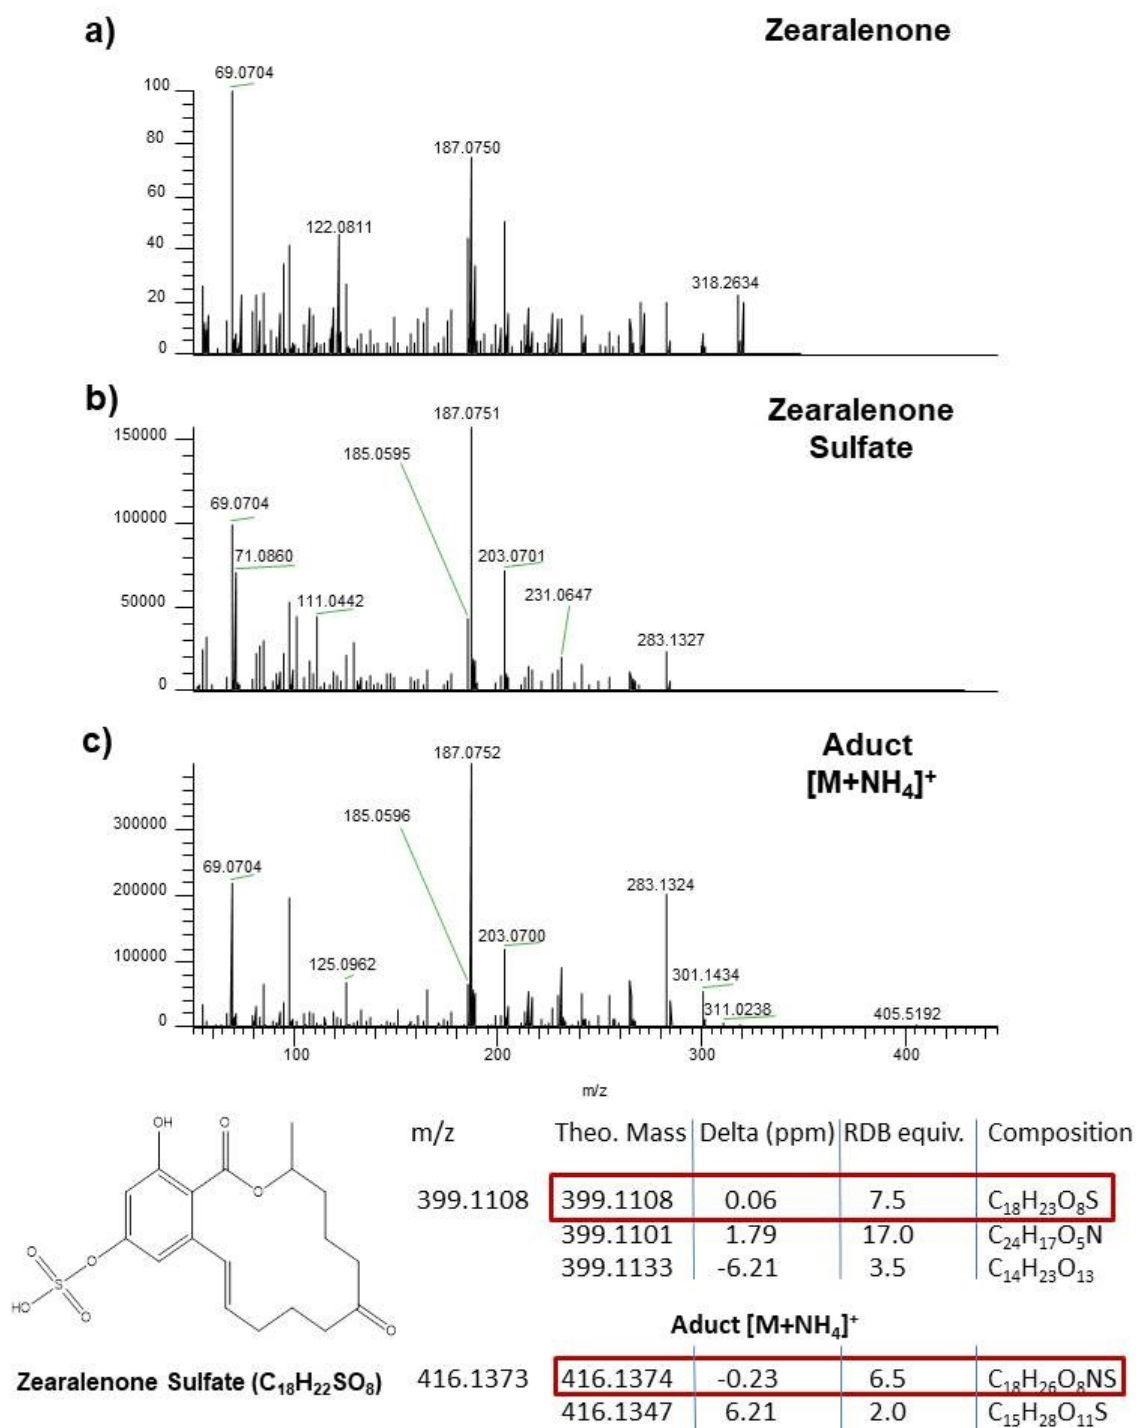

**Figure S9.** LC-MS/MS spectra comparison between **a)** zearalenone ( $m/z$  319.1541); **b)** zearalenone sulfate ( $m/z$  399.1108); **c)** the adduct  $[M+NH_4]^+$  ( $m/z$  416.1374).

# AUROFUSARIN

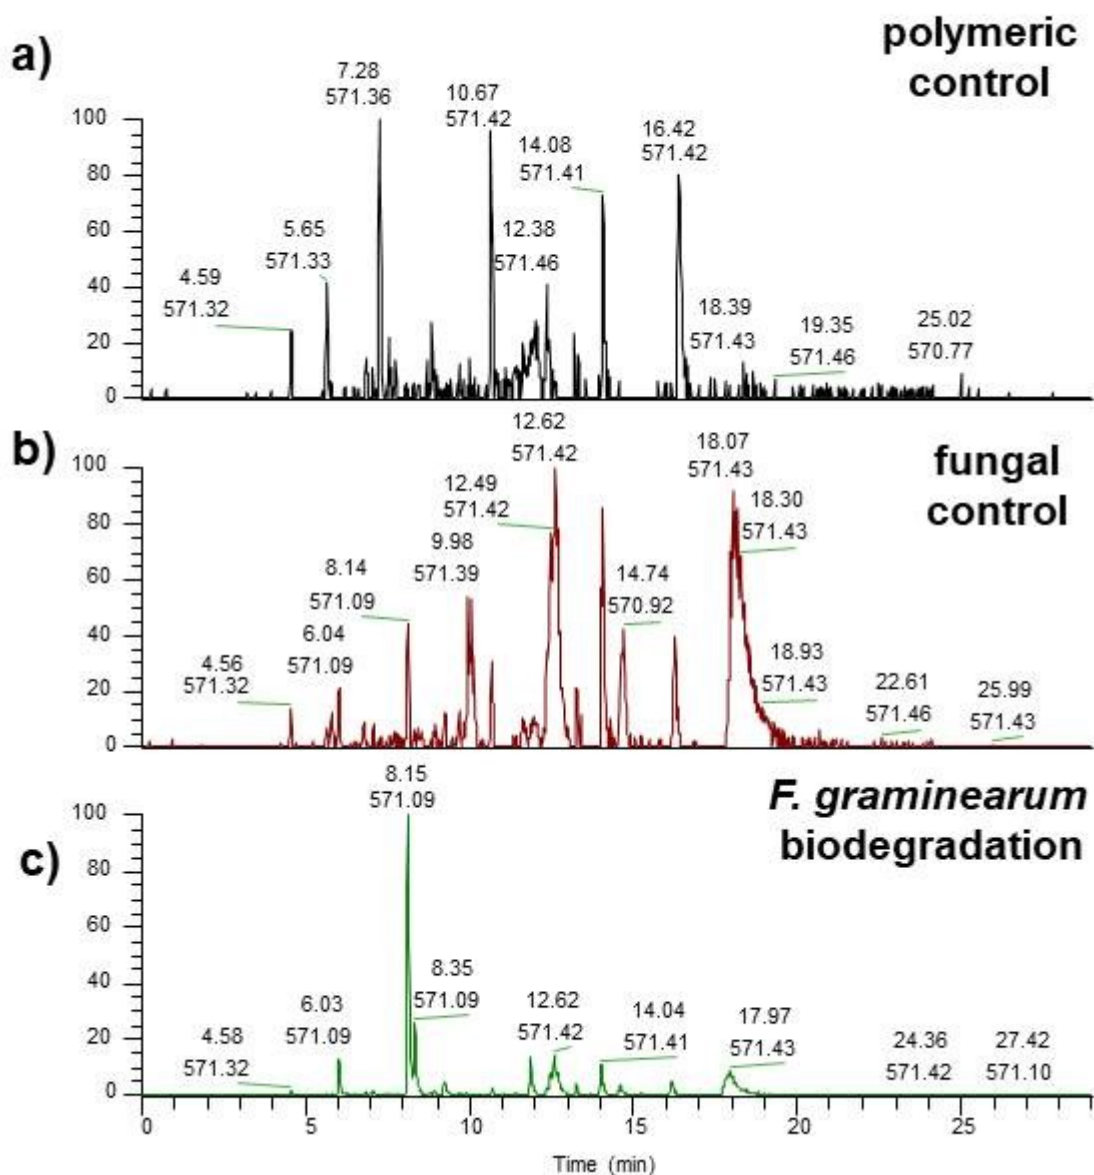

**Figure S10.** Ion chromatogram extracted ( $m/z$  571.0869) to **a)** polymeric control; **b)** fungal control; **c)** *F. graminearum* biodegradation. LC-MS/MS spectrum of aurofusarin was found at retention time 8.15 min.

# AUROFUSARIN - $m/z$ 571.0871 $[M+H]^+$

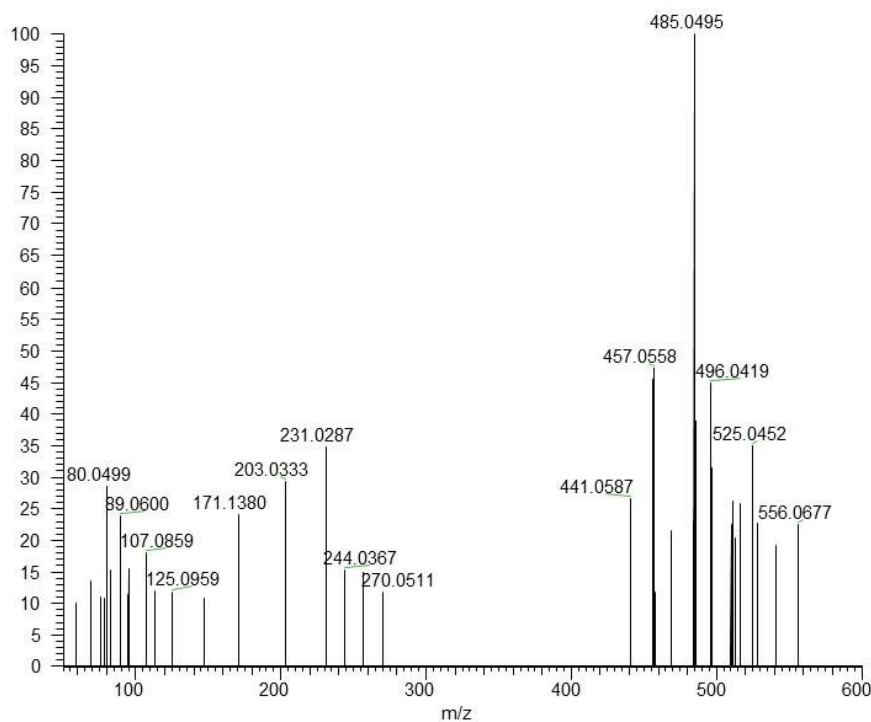

| Database $m/z$<br>(MassBank)<br>spectrum | Error Mass<br>bank (ppm) | Experimental $m/z$ | Error (ppm) | Formula Xcalibur     |
|------------------------------------------|--------------------------|--------------------|-------------|----------------------|
| 203.0330                                 | -4.31                    | 203.0333           | -2.98       | $C_{11}H_7O_4$       |
| 231.0274                                 | -5.00                    | 231.0287           | -0.49       | $C_{12}H_7O_5$       |
| 441.0588                                 | -3.79                    | 441.0587           | -4.03       | $C_{25}H_{13}O_8$    |
| 485.0490                                 | -2.66                    | 485.0495           | -1.63       | $C_{26}H_{13}O_{10}$ |
| 496.0410                                 | -2.96                    | 496.0419           | -1.27       | $C_{27}H_{12}O_{10}$ |
| 497.0487                                 | -3.20                    | 497.0493           | -2.09       | $C_{27}H_{13}O_{10}$ |
| 510.0565                                 | -3.17                    | 510.0575           | -1.34       | $C_{28}H_{14}O_{10}$ |
| 511.0643                                 | -3.22                    | 511.0657           | -0.59       | $C_{28}H_{15}O_{10}$ |
| 516.0670                                 | -3.26                    | 516.0671           | -3.05       | $C_{27}H_{16}O_{11}$ |
| 528.0685                                 | -0.34                    | 528.0673           | -2.63       | $C_{28}H_{16}O_{11}$ |
| 556.0617                                 | -3.40                    | 556.0677           | -7.41       | $C_{29}H_{16}O_{12}$ |

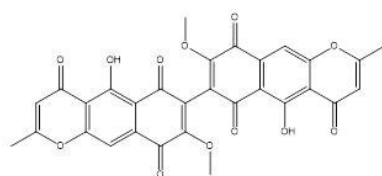

Aurofusarin ( $C_{30}H_{18}O_{12}$ )

| $m/z$    | Theo. Mass | Delta (ppm) | RDB equiv. | Composition           |
|----------|------------|-------------|------------|-----------------------|
| 571.0870 | 571.0871   | -0.11       | 21.5       | $C_{30}H_{19}O_{12}$  |
|          | 571.0905   | -6.01       | 16.5       | $C_{27}H_{23}O_{12}S$ |

**Figure S11.** LC-MS/MS spectrum of aurofusarin for 35 V and comparison of experimental  $m/z$  values with database MassBank (<https://massbank.eu/MassBank/RecordDisplay?id=AC000703>).

#### 4. LC-MS/MS of the biodegradation process

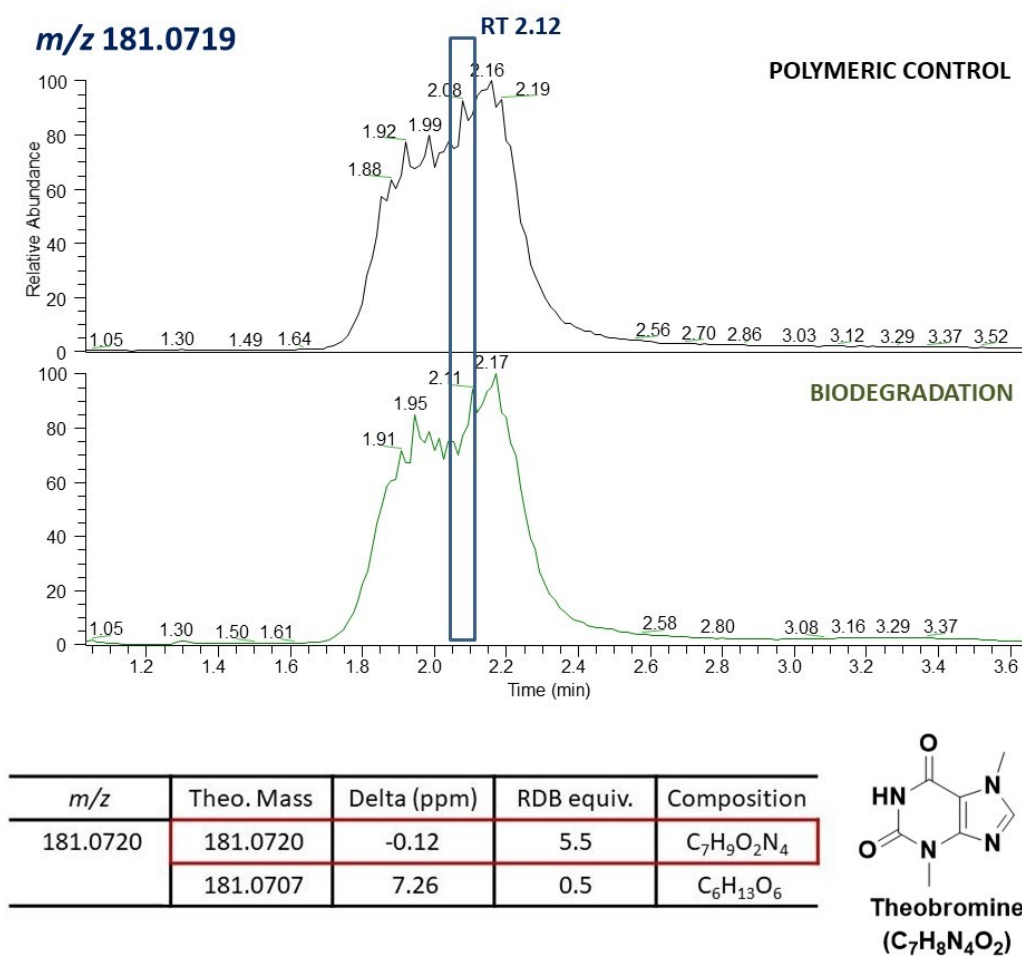

**Figure S12.** Chromatograms of control sample and biodegradation process using *Colletotrichum gloeosporioides*.  $m/z$  181.0720 (positive mode) is related to theobromine and was found at retention time 2.12 min.

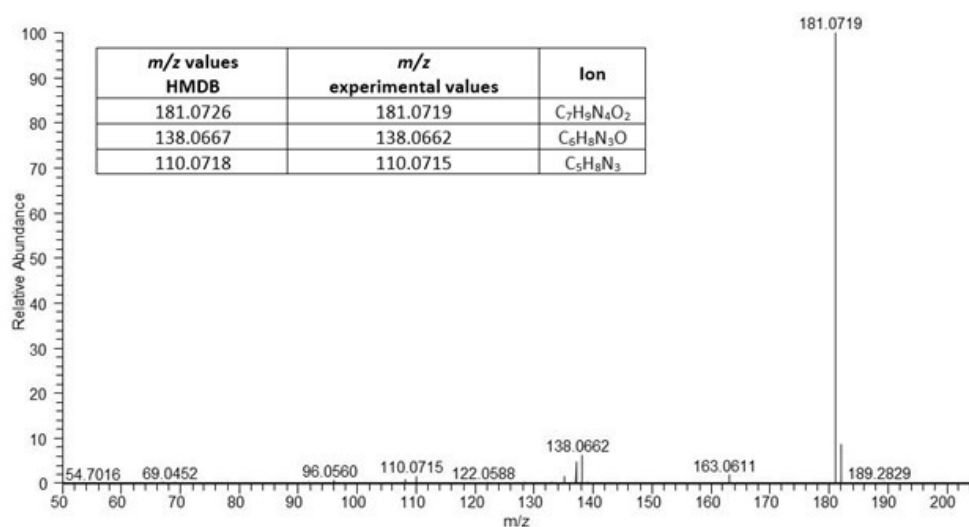

**Figure S13.** LC-MS/MS ( $m/z$  180.9842) in positive mode of control sample related to theobromine. Putatively annotated compound in comparison to the Human Metabolome Database ([https://hmdb.ca/spectra/ms\\_ms/240224](https://hmdb.ca/spectra/ms_ms/240224)).

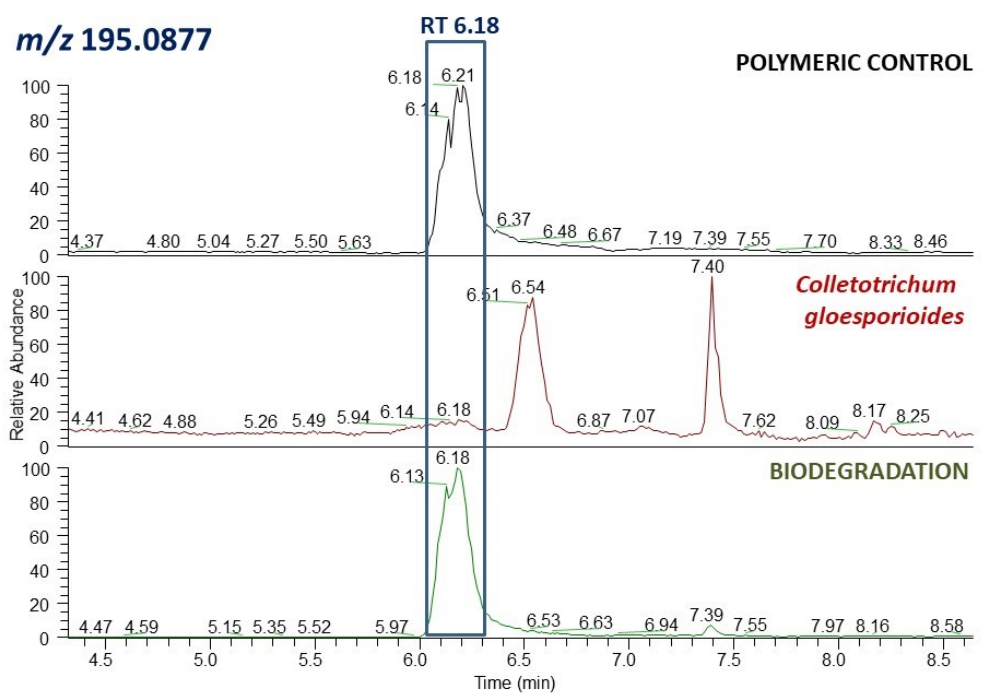

| $m/z$    | Theo. Mass | Delta (ppm) | RDB equiv. | Composition        |
|----------|------------|-------------|------------|--------------------|
| 195.0877 | 195.0877   | 0.19        | 5.5        | $C_8H_{11}O_2N_4$  |
|          | 195.0890   | 6.69        | 5.0        | $C_{10}H_{13}O_3N$ |

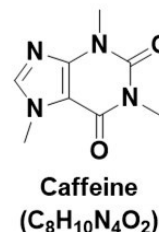

**Figure S14.** Chromatograms of control sample, fungal extract of *Colletotrichum gloeosporioides* and biodegradation process.  $m/z$  195.0877 (positive mode) is related to caffeine and was found at retention time 6.18 min.

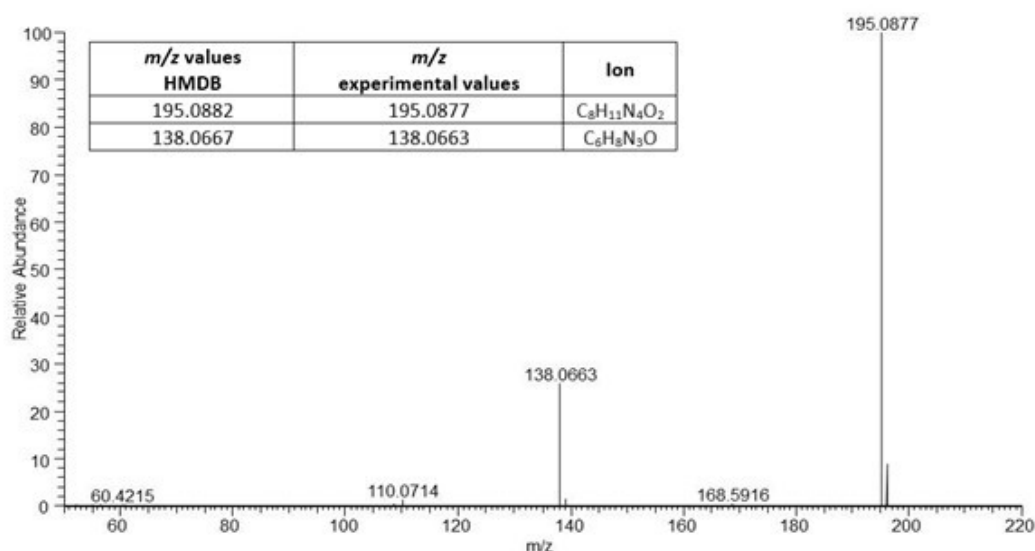

**Figure S15.** LC-MS/MS ( $m/z$  195.0090) in positive mode of control sample related to caffeine. Putatively annotated compound in comparison to the Human Metabolome Database ([https://hmdb.ca/spectra/ms\\_ms/21351](https://hmdb.ca/spectra/ms_ms/21351)).

**Table S5.** Relative quantification of peaks on LC-MS/MS spectra of theobromine ( $m/z$  181.0720, r.t. 2.12 min) and caffeine ( $m/z$  195.0877, r.t. 6.18 min) after 75 days of biodegradation

| Compounds   | Measurements     | Control     | <i>C. gloeosporioides</i> | <i>F. graminearum</i> | <i>Xylaria</i> sp. |
|-------------|------------------|-------------|---------------------------|-----------------------|--------------------|
| Theobromine | 1                | 685,709,819 | 1,315,828,545             | 2,124,585,302         | 627,888,072        |
|             | 2                | 757,268,190 | 1,401,761,320             | 2,423,704,429         | 426,625,349        |
|             | 3                | 609,340,610 | 1,320,908,933             | 1,807,587,535         | 426,625,349        |
|             | average          | 684,106,206 | 1,346,166,266             | 2,118,625,755         | 493712923,3        |
|             | <i>p</i> -values |             | 0.001                     | 0.009                 | 0.137              |
| Caffeine    | 1                | 336,773,908 | 1,289,410,747             | 2,182,693,125         | 636,269,338        |
|             | 2                | 432,731,451 | 1,451,127,228             | 1,817,805,552         | 495,072,588        |
|             | 3                | 256,969,237 | 1,113,455,339             | 1,668,742,221         | 495,072,588        |
|             | average          | 342,158,198 | 1,284,664,438             | 1,889,746,966         | 542,138,171        |
|             | <i>p</i> -values |             | 0.0006                    | 0,0025                | 0.0266             |
